# Supplementary material for: Metabolites of Prickly Rose: Chemodiversity and Digestive-Enzyme-Inhibiting Potential of Rosa acicularis and the Main Ellagitannin Rugosin D
Source: MDPI journal article supplement (doi:10.3390/plants10112525), 2021-11-20
Supplement: s1 [file s1]

Supplementary Material

# Metabolites of Prickly Rose: Chemodiversity and Digestive-Enzyme-Inhibiting Potential of *Rosa acicularis* and the Main Ellagitannin Rugosin D

Daniil N. Olennikov <sup>1,\*</sup>, Vladimir V. Chemposov <sup>2</sup> and Nadezhda K. Chirikova <sup>2</sup>

<sup>1</sup> Laboratory of Medical and Biological Research, Institute of General and Experimental Biology, Siberian Division, Russian Academy of Science, 670047 Ulan-Ude, Russia

<sup>2</sup> Department of Biology, Institute of Natural Sciences, North-Eastern Federal University, 677027 Yakutsk, Russia; soulkage94@gmail.com (V.V.C.), hofnung@mail.ru (N.K.C.)

\* Correspondence: olennikovdn@mail.ru; Tel.: +8-902-160-06-27

---

## Content

**Table S1.** Reference standards and internal standards used for the qualitative and quantitative analysis by HPLC-MS and HPLC-DAD.

**Table S2.** Optimized MRM transitions of compounds **1–123** in HPLC-MS/MS analysis.

**Table S3.** Regression equations, correlation coefficients, standard deviation, limits of detection, limits of quantification and linear ranges for 34 reference standards.

**Figure S1.** HPLC-DAD chromatograms of gastro-intestinal digestion markers after digestion of artificial substrate mixture.

**Table S1.** Reference standards and internal standards used for the qualitative and quantitative analysis by HPLC-MS and HPLC-DAD.

| Compound (No in Table 2), Formula                                                                                         | Purity (≥), % | Manufacturer (cat. No) or Isolation Reference *              | Used for Qualitative (QL) and Quantitative (QT) Analysis of Compounds (No in Table 2) |
|---------------------------------------------------------------------------------------------------------------------------|---------------|--------------------------------------------------------------|---------------------------------------------------------------------------------------|
| 1-O-Galloyl-β-D-glucopyranose (1)<br>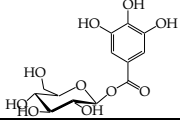    | 90            | Sigma (69288)                                                | QL: 1. QT: 1                                                                          |
| Gallic acid (2)<br>                      | 97            | Sigma (G7384)                                                | QL: 2. QT: 2                                                                          |
| 1-O-Caffeoylquinic acid (3)<br>          | 98            | ChemFaces (CFN99121)                                         | QL: 3. QT: 3, 7                                                                       |
| 2-Pyrone-4,6-dicarboxylic acid (8)<br>  | 95            | Lab collection/isolated from <i>Comarum palustre</i> [87]    | QL: 8. QT: 8                                                                          |
| Epigallocatechin (9)<br>               | 98            | Extrasynthese (09795)                                        | QL: 9. QT: 9                                                                          |
| 5-O-Caffeoylquinic acid (10)<br>       | 95            | Sigma (C3878)                                                | QL: 10. QT: 10                                                                        |
| Catechin (11)<br>                      | 99            | Extrasynthese (09765)                                        | QL: 11. QT: 11                                                                        |
| 1,6-Di-O-galloyl glucose (13)<br>      | 92            | Toronto (D293195)                                            | QL: 13. QT: 12, 13                                                                    |
| Tellimagrandin I <sub>1</sub> (14)<br> | No data       | Lab collection/isolated from <i>Filipendula ulmaria</i> [88] | QL: 14                                                                                |
| Epicatechin (15)<br>                   | 99            | Extrasynthese (09775)                                        | QL: 15. QT: 15                                                                        |

|                                                                                                                                |         |                                                                    |                        |
|--------------------------------------------------------------------------------------------------------------------------------|---------|--------------------------------------------------------------------|------------------------|
| <b>Rugosin B<sub>1</sub> (16)</b><br>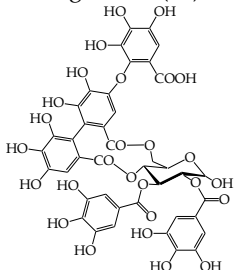         | No data | Lab collection/isolated<br>from <i>Filipendula ulmaria</i><br>[88] | QL: 16                 |
| <b>1,3,6-Tri-O-galloyl glucose (18)</b><br>   | 90      | Sigma (78864)                                                      | QL: 18. QT: 17, 18, 20 |
| <b>Tellimagrandin I<sub>2</sub> (19)</b><br> | No data | Lab collection/isolated<br>from <i>Filipendula ulmaria</i><br>[88] | QL: 19                 |
| <b>Tellimagrandin II (21)</b><br>           | No data | Lab collection/isolated<br>from <i>Filipendula ulmaria</i><br>[88] | QL: 21                 |
| <b>Rugosin B<sub>2</sub> (22)</b><br>       | No data | Lab collection/isolated<br>from <i>Filipendula ulmaria</i><br>[88] | QL: 22                 |

Rugosin E<sub>1</sub> (24)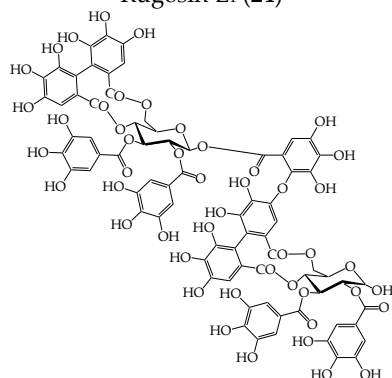

No data

Lab collection/isolated  
from *Filipendula ulmaria*  
[88]

QL: 24

Rugosin E<sub>2</sub> (25)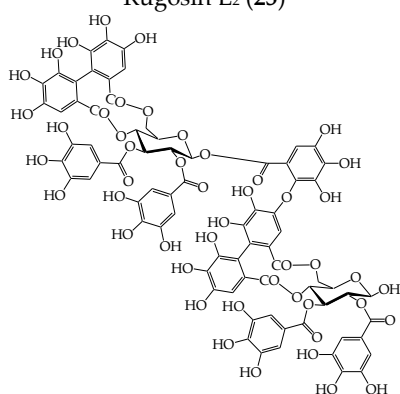

No data

Lab collection/isolated  
from *Filipendula ulmaria*  
[88]

QL: 25

Rugosin A (26)

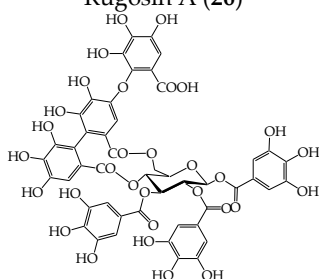

No data

Lab collection/isolated  
from *Filipendula ulmaria*  
[88]

QL: 26

Rugosin D (27)

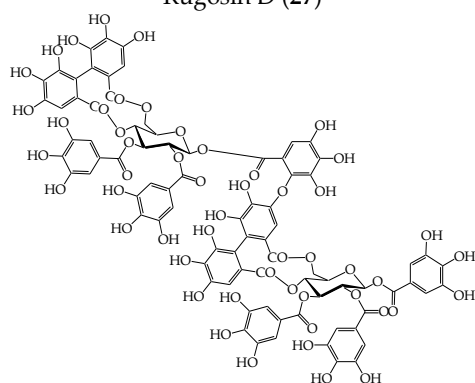

No data

Lab collection/isolated  
from *Filipendula ulmaria*  
[88]

QL: 27

1-O-Ellagoyl-β-D-glucopyranoside (28)

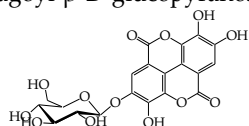

No data

Lab collection/isolated  
from *Punica granatum*  
[40]

QL: 28

|                                                                                                                                                                                                        |         |                                                              |                                                                                     |
|--------------------------------------------------------------------------------------------------------------------------------------------------------------------------------------------------------|---------|--------------------------------------------------------------|-------------------------------------------------------------------------------------|
| <p>Ellagic acid (<b>29</b>)</p> 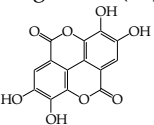                                                                                      | 95      | Sigma (E2250)                                                | QL: <b>29</b> . QT: <b>6, 29, 30, 31, 36, 39, 43, 44, 90, 91, 94, 110, 112, 113</b> |
| <p>1,2,3,6-Tetra-<i>O</i>-galloyl glucose (<b>33</b>)</p>                                                             | 98      | BioBioPha (BBPP05354)                                        | QL: <b>33</b> . QT: <b>32, 33</b>                                                   |
| <p>1,2,3,4,6-Penta-<i>O</i>-galloyl glucose (<b>47</b>)</p>                                                           | 96      | Sigma (67548)                                                | QL: <b>47</b> . QT: <b>46, 47, 48, 49, 50, 92</b>                                   |
| <p>Rutin = quercetin-3-<i>O</i>-rutinoside (<b>65</b>)</p>                                                           | 95      | Sigma (R2303)                                                | QL: <b>65</b> . QT: <b>52, 54, 57, 61, 66, 67, 65</b>                               |
| <p>Miquelianin =<br/>quercetin-3-<i>O</i>-β-D-glucuronopyranoside (<b>68</b>)</p>                                   | 95      | Sigma (00310590)                                             | QL: <b>68</b> . QT: <b>68</b>                                                       |
| <p>Kaempferol-3-<i>O</i>-β-D-glucuronopyranoside (<b>71</b>)</p>                                                    | 97      | Sigma (79273)                                                | QL: <b>71</b> . QT: <b>58, 60, 62, 69, 70, 71</b>                                   |
| <p>Quercitrin =<br/>quercetin-3-<i>O</i>-α-L-rhamnopyranoside (<b>72</b>)</p>                                       | 98      | Sigma (740580)                                               | QL: <b>72</b> . QT: <b>72</b>                                                       |
| <p>Helichrysoside =<br/>quercetin-3-<i>O</i>-(6''-<i>O</i>-<i>p</i>-coumaroyl)-β-D-glucopyranoside (<b>73</b>)</p>  | No data | Lab collection/isolated from <i>Spiraea salicifolia</i> [89] | QL: <b>73, 78, 79, 80, 81</b>                                                       |
| <p>Juglanin =<br/>kaempferol-3-<i>O</i>-α-L-arabinofuranoside (<b>74</b>)</p>                                       | 98      | MCE (HY-N3442)                                               | QL: <b>74</b> . QT: <b>74</b>                                                       |

|                                                                                                                |    |                       |                                                                                                                                  |
|----------------------------------------------------------------------------------------------------------------|----|-----------------------|----------------------------------------------------------------------------------------------------------------------------------|
| Tiliroside =<br>kaempferol-3- <i>O</i> -(6''- <i>O</i> - <i>p</i> -coumaroyl)- $\beta$ -D-glucopyranoside (75) |    |                       |                                                                                                                                  |
| 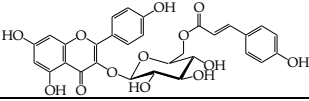                              | 98 | Sigma (79257)         | QL: 75. QT: 75, 82, 83, 84, 85, 86                                                                                               |
| Kaempferol-3- <i>O</i> -(6''-galloyl)- $\beta$ -D-glucopyranoside (76)                                         |    |                       |                                                                                                                                  |
|                               | 98 | ChemFaces (CFN92383)  | QL: 76. QT: 59, 76, 77                                                                                                           |
| Peonidin 3,5-di- <i>O</i> - $\beta$ -D-glucopyranoside (93)                                                    |    |                       |                                                                                                                                  |
|                               | 90 | Extrasynthese (0918)  | QL: 93. QT: 93                                                                                                                   |
| Procyanidin B <sub>3</sub> (97)                                                                                |    |                       |                                                                                                                                  |
|                              | 95 | Carbosynth (FP65542)  | QL: 97. QT: 97                                                                                                                   |
| Procyanidin B <sub>1</sub> (98)                                                                                |    |                       |                                                                                                                                  |
|                             | 99 | MCE (HY-N0795)        | QL: 98. QT: 34, 35, 37, 38, 40, 41, 42, 45, 95, 96, 98, 99, 101, 102, 103, 104, 114, 115, 116, 117, 118, 119, 120, 121, 122, 123 |
| Procyanidin B <sub>4</sub> (100)                                                                               |    |                       |                                                                                                                                  |
|                             | 98 | ChemFaces (CFN91171)  | QL: 100. QT: 100                                                                                                                 |
| Procyanidin B <sub>2</sub> (105)                                                                               |    |                       |                                                                                                                                  |
|                             | 90 | Sigma (42157)         | QL: 105. QT: 105                                                                                                                 |
| Procyanidin B <sub>2</sub> 3- <i>O</i> -gallate (106)                                                          |    |                       |                                                                                                                                  |
|                             | 95 | TransMIT (C6201-P044) | QL: 106. QT: 106, 108                                                                                                            |

|                                                                                                                                                                          |         |                                                                   |                                                                     |
|--------------------------------------------------------------------------------------------------------------------------------------------------------------------------|---------|-------------------------------------------------------------------|---------------------------------------------------------------------|
| Procyanidin B <sub>2</sub> 3''-O-gallate ( <b>107</b> )<br>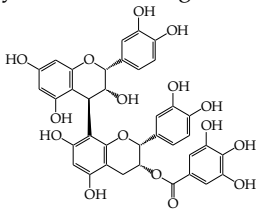                             | 97      | ALB (ALB-RS-9598)                                                 | QL: <b>107</b> . QT: <b>107</b>                                     |
| Procyanidin B <sub>2</sub> 3,3''-di-O-gallate ( <b>109</b> )<br>                        | 97      | BOC (79907-44-1)                                                  | QL: <b>109</b> . QT: <b>109</b>                                     |
| Amritoside = 1-O-ellagoyl-gentiobiose ( <b>110</b> )<br>                                | No data | Lab collection/isolated from <i>Punica granatum</i> [40]          | QL: <b>110</b>                                                      |
| Epicatechin gallate ( <b>111</b> )<br>                                                 | 97.5    | Extrasynthese (0978S)                                             | QL: <b>111</b> . QT: <b>111</b>                                     |
| Eschweilenol C = ellagic acid<br>4-O- $\alpha$ -L-rhamnopyranoside ( <b>113</b> )<br> | 98      | ChemFaces (CFN95363)                                              | QL: <b>113</b> . QT: <b>113</b>                                     |
| Corilagin<br>                                                                         | 98      | Sigma (G0424)                                                     | QT: <b>4, 5, 14, 16, 19, 21, 22, 23, 24, 25, 26, 27, 87, 88, 89</b> |
| Taxifolin = dihydroquercetin<br>                                                      | 95      | Sigma (PHL89284)                                                  | QT: <b>51, 53, 55, 63, 64</b>                                       |
| Quercetin-3-O-(6''-galloyl)- $\beta$ -D-galactopyranoside<br>                         | 98      | MCE (HY-N7024)                                                    | QT: <b>56</b>                                                       |
| 3',4'-Di-O-acetyl- <i>cis</i> -khellactone<br>                                        | No data | Lab collection/isolated from <i>Phlojodicarpus sibiricus</i> [90] | Internal standard 1                                                 |

|                                                                                                                             |         |                                                              |                                                                                                  |
|-----------------------------------------------------------------------------------------------------------------------------|---------|--------------------------------------------------------------|--------------------------------------------------------------------------------------------------|
| <b>Isovitexin-7,2''-di-O-glucoside</b><br>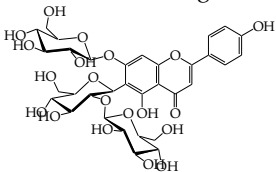 | No data | Lab collection/isolated from <i>Silene dioica</i> [91]       | Internal standard 2                                                                              |
| <b>Isojaceoside</b><br>                    | No data | Lab collection/isolated from <i>Artemisia frigida</i> [92]   | Internal standard 3                                                                              |
| <b>6-O-Sinapoyl catalpol</b><br>           | No data | Lab collection/isolated from <i>Veronica longifolia</i> [93] | Internal standard 4                                                                              |
| <b>Neomangiferin</b><br>                   | No data | Lab collection/isolated from <i>Gentiana daurica</i> [94]    | Internal standard 5                                                                              |
| <b>p-Nitrophenol</b><br>                 | 99      | Sigma (241326)                                               | Marker of ethyldene- <i>p</i> -nitrophenyl- $\alpha$ -D-maltoheptaoside digestion                |
| <b>7-Amino-4-methylcoumarin</b><br>      | 99      | Sigma (257370)                                               | Marker of <i>N</i> $\alpha$ -benzoyl-L-arginine-7-amino-4-methylcoumarin hydrochloride digestion |
| <b>4-Methylumbelliferone</b><br>         | 98      | Sigma (M1381)                                                | Marker of 4-methylumbelliferyl heptanoate digestion                                              |

\* Manufacturers list: ALB—ALB Materials Inc (Henderson, NV, USA); BioBioPha—BioBioPha (Kunming, Yunnan, PRC); BOC—BOC Sciences (Shirley, NY, USA); Carbosynth—Carbosynth Ltd (Compton, Great Britain); ChemFaces—ChemFaces (Wuhan, Hubei, PRC); Extrasynthese—Extrasynthese (Lyon, France); MCE—MCE Med Chem Express (Monmouth, NJ, USA); Sigma—Sigma-Aldrich (St. Louis, MO, USA); Toronto—Toronto Research Chemicals (North York, ON, Canada); TransMIT—TransMIT GmbH (Gießen, Germany).



**Table S2.** Optimized MRM transitions of compounds 1–123 in HPLC-MS/MS analysis.

| No | Compound                                   | Ionization | Precursor | Quantifier |
|----|--------------------------------------------|------------|-----------|------------|
| 1  | 1-O-Galloyl glucose (glucogallin)          | Negative   | 331       | 169        |
| 2  | Gallic acid                                | Negative   | 169       | 125        |
| 3  | 1-O-Caffeoylquinic acid                    | Negative   | 353       | 135        |
| 4  | Galloyl-hexahydroxydiphenoyl-di-O-hexoside | Negative   | 795       | 301        |
| 5  | Galloyl-hexahydroxydiphenoyl-di-O-hexoside | Negative   | 795       | 301        |
| 6  | Ellagic acid tri-O-hexoside                | Negative   | 787       | 301        |
| 7  | Caffeic acid O-hexoside                    | Negative   | 341       | 179        |
| 8  | 2-Pyrone-4,6-dicarboxylic acid             | Negative   | 183       | 111        |
| 9  | Epigallocatechin                           | Negative   | 305       | 137        |
| 10 | 5-O-Caffeoylquinic acid                    | Negative   | 353       | 165        |
| 11 | Catechin                                   | Negative   | 289       | 137        |
| 12 | Di-O-galloyl hexose                        | Negative   | 483       | 169        |
| 13 | 1,6-Di-O-galloyl glucose                   | Negative   | 483       | 125        |
| 14 | Tellimagrandin I <sub>1</sub>              | Negative   | 392       | 301        |
| 15 | Epicatechin                                | Negative   | 289       | 137        |
| 16 | Rugosin B <sub>1</sub>                     | Negative   | 476       | 301        |
| 17 | Tri-O-galloyl hexose                       | Negative   | 635       | 169        |
| 18 | 1,3,6-Tri-O-galloyl glucose                | Negative   | 635       | 169        |
| 19 | Tellimagrandin I <sub>2</sub>              | Negative   | 392       | 301        |
| 20 | Tri-O-galloyl hexose                       | Negative   | 635       | 169        |
| 21 | Tellimagrandin II <sub>1</sub>             | Negative   | 468       | 301        |
| 22 | Rugosin B <sub>2</sub>                     | Negative   | 476       | 301        |
| 23 | Tellimagrandin II <sub>2</sub>             | Negative   | 468       | 301        |
| 24 | Rugosin E <sub>1</sub>                     | Negative   | 860       | 301        |
| 25 | Rugosin E <sub>2</sub>                     | Negative   | 860       | 301        |
| 26 | Rugosin A                                  | Negative   | 552       | 301        |
| 27 | Rugosin D                                  | Negative   | 623       | 301        |
| 28 | 1-O-Ellagoyl glucose                       | Negative   | 463       | 301        |
| 29 | Ellagic acid                               | Negative   | 301       | 185        |
| 30 | Ellagic acid methyl ester O-hexoside       | Negative   | 477       | 301        |
| 31 | Ellagic acid methyl ester O-hexoside       | Negative   | 477       | 301        |
| 32 | Tetra-O-galloyl hexose                     | Negative   | 787       | 169        |
| 33 | 1,2,3,6-Tetra-O-galloyl glucose            | Negative   | 787       | 169        |
| 34 | Epicatechin / catechin trimer              | Negative   | 865       | 451        |
| 35 | Epicatechin / catechin trimer              | Negative   | 865       | 451        |
| 36 | Ellagic acid dimethyl ester O-hexoside     | Negative   | 491       | 329        |
| 37 | Epicatechin / catechin trimer              | Negative   | 865       | 577        |
| 38 | Epicatechin / catechin trimer              | Negative   | 865       | 577        |
| 39 | Di-ellagoyl methyl ester O-hexoside        | Negative   | 761       | 477        |
| 40 | Epicatechin / catechin tetramer            | Negative   | 1153      | 577        |
| 41 | Epicatechin / catechin tetramer            | Negative   | 1153      | 577        |

|    |                                                                                          |          |      |     |
|----|------------------------------------------------------------------------------------------|----------|------|-----|
| 42 | Epicatechin / catechin tetramer                                                          | Negative | 1153 | 577 |
| 43 | Di-ellagoyl dimethyl ester <i>O</i> -hexoside                                            | Negative | 775  | 477 |
| 44 | Ellagic acid trimethyl ester <i>O</i> -hexoside                                          | Negative | 505  | 343 |
| 45 | Epicatechin / catechin tetramer                                                          | Negative | 1153 | 863 |
| 46 | Penta- <i>O</i> -galloyl hexose                                                          | Negative | 939  | 787 |
| 47 | 1,2,3,4,6-Penta- <i>O</i> -galloyl glucose                                               | Negative | 939  | 787 |
| 48 | Hexa- <i>O</i> -galloyl hexose                                                           | Negative | 1091 | 787 |
| 49 | Hexa- <i>O</i> -galloyl hexose                                                           | Negative | 1091 | 787 |
| 50 | Hexa- <i>O</i> -galloyl hexose                                                           | Negative | 1091 | 787 |
| 51 | Dihydroquercetin di- <i>O</i> -hexuronoside-di- <i>O</i> -hexoside                       | Negative | 979  | 817 |
| 52 | Quercetin di- <i>O</i> -hexuronoside-tri- <i>O</i> -hexoside                             | Negative | 1139 | 815 |
| 53 | Dihydroquercetin <i>O</i> -hexuronoside-di- <i>O</i> -hexoside                           | Negative | 803  | 641 |
| 54 | Quercetin <i>O</i> -hexuronoside-tri- <i>O</i> -hexoside                                 | Negative | 963  | 801 |
| 55 | Dihydroquercetin <i>O</i> -hexuronoside- <i>O</i> -hexoside                              | Negative | 641  | 479 |
| 56 | Quercetin <i>O</i> -hexuronoside-tri- <i>O</i> -hexoside- <i>O</i> -gallate              | Negative | 1115 | 639 |
| 57 | Quercetin di- <i>O</i> -hexuronoside-di- <i>O</i> -hexoside                              | Negative | 977  | 653 |
| 58 | Kaempferol <i>O</i> -hexuronoside-tri- <i>O</i> -hexoside                                | Negative | 947  | 623 |
| 59 | Kaempferol <i>O</i> -hexuronoside-tri- <i>O</i> -hexoside- <i>O</i> -gallate             | Negative | 1099 | 623 |
| 60 | Kaempferol di- <i>O</i> -hexuronoside-di- <i>O</i> -hexoside                             | Negative | 961  | 461 |
| 61 | Quercetin <i>O</i> -hexuronoside-di- <i>O</i> -hexoside                                  | Negative | 801  | 477 |
| 62 | Kaempferol <i>O</i> -hexuronoside-di- <i>O</i> -hexoside                                 | Negative | 785  | 461 |
| 63 | Dihydroquercetin <i>O</i> -hexoside                                                      | Negative | 465  | 303 |
| 64 | Dihydroquercetin <i>O</i> -hexuronoside                                                  | Negative | 479  | 303 |
| 65 | Quercetin- <i>O</i> -rutinoside (rutin)                                                  | Negative | 609  | 463 |
| 66 | Quercetin <i>O</i> -hexuronoside- <i>O</i> -hexoside                                     | Negative | 639  | 477 |
| 67 | Quercetin <i>O</i> -hexuronoside- <i>O</i> -pentoside                                    | Negative | 609  | 477 |
| 68 | Quercetin-3- <i>O</i> -glucuronide (miquelianin)                                         | Negative | 477  | 301 |
| 69 | Kaempferol <i>O</i> -hexuronoside- <i>O</i> -hexoside                                    | Negative | 623  | 461 |
| 70 | Kaempferol <i>O</i> -hexuronoside- <i>O</i> -pentoside                                   | Negative | 593  | 461 |
| 71 | Kaempferol-3- <i>O</i> -glucuronide                                                      | Negative | 461  | 285 |
| 72 | Quercetin-3- <i>O</i> -rhamnoside (quercitrin)                                           | Negative | 447  | 301 |
| 73 | Quercetin-3- <i>O</i> -(6''- <i>O</i> - <i>p</i> -coumaroyl)-glucoside (helichrysoside)  | Negative | 609  | 463 |
| 74 | Kaempferol-3- <i>O</i> -arabinoside (juglanin)                                           | Negative | 417  | 285 |
| 75 | Kaempferol-3- <i>O</i> -(6''- <i>O</i> - <i>p</i> -coumaroyl)-glucoside (tiliroside)     | Negative | 593  | 447 |
| 76 | Kaempferol-3- <i>O</i> -(6''- <i>O</i> -galloyl)-glucoside                               | Negative | 599  | 447 |
| 77 | Kaempferol <i>O</i> -hexuronoside- <i>O</i> -gallate                                     | Negative | 613  | 461 |
| 78 | Quercetin <i>O</i> -hexoside- <i>O</i> - <i>p</i> -coumarate- <i>O</i> -gallate          | Negative | 761  | 609 |
| 79 | Quercetin <i>O</i> -hexuronoside- <i>O</i> - <i>p</i> -coumarate- <i>O</i> -gallate      | Negative | 775  | 623 |
| 80 | Quercetin <i>O</i> -hexoside-di- <i>O</i> - <i>p</i> -coumarate                          | Negative | 755  | 463 |
| 81 | Quercetin <i>O</i> -hexuronoside-di- <i>O</i> - <i>p</i> -coumarate                      | Negative | 769  | 477 |
| 82 | Kaempferol <i>O</i> -hexuronoside- <i>O</i> - <i>p</i> -coumarate- <i>O</i> -gallate     | Negative | 759  | 607 |
| 83 | Kaempferol <i>O</i> -hexuronoside- <i>O</i> -hexoside-di- <i>O</i> - <i>p</i> -coumarate | Negative | 915  | 461 |
| 84 | Kaempferol <i>O</i> -hexoside-di- <i>O</i> - <i>p</i> -coumarate                         | Negative | 739  | 447 |

|     |                                                                                                 |          |      |     |
|-----|-------------------------------------------------------------------------------------------------|----------|------|-----|
| 85  | Kaempferol <i>O</i> -hexuronoside-di- <i>O</i> - <i>p</i> -coumarate                            | Negative | 753  | 461 |
| 86  | Kaempferol <i>O</i> -hexuronoside-tri- <i>O</i> - <i>p</i> -coumarate                           | Negative | 899  | 461 |
| 87  | Hexahydroxydiphenoyl-tri- <i>O</i> -galloyl-hexose (tellimagrandin II isomer)                   | Negative | 468  | 301 |
| 88  | Valoneoyl-tri- <i>O</i> -galloyl-hexose (rugosin A isomer)                                      | Negative | 552  | 301 |
| 89  | Hexahydroxydiphenoyl-valoneoyl-tetra- <i>O</i> -galloyl-di- <i>O</i> -hexose (rugosin D isomer) | Negative | 623  | 765 |
| 90  | Ellagic acid <i>O</i> -hexoside                                                                 | Negative | 463  | 301 |
| 91  | Epicatechin / catechin tetramer                                                                 | Negative | 1153 | 577 |
| 92  | Hexa- <i>O</i> -galloyl hexoside                                                                | Negative | 1091 | 635 |
| 93  | Peonidin 3,5-di- <i>O</i> -glucoside                                                            | Positive | 625  | 301 |
| 94  | Ellagic acid tri- <i>O</i> -hexoside                                                            | Negative | 787  | 463 |
| 95  | Epicatechin / catechin dimer <i>O</i> -hexoside                                                 | Negative | 739  | 451 |
| 96  | Epicatechin / catechin dimer <i>O</i> -hexoside                                                 | Negative | 739  | 451 |
| 97  | Procyanidin B <sub>3</sub>                                                                      | Negative | 577  | 407 |
| 98  | Procyanidin B <sub>1</sub>                                                                      | Negative | 577  | 407 |
| 99  | Epicatechin / catechin dimer <i>O</i> -hexoside                                                 | Negative | 739  | 451 |
| 100 | Procyanidin B <sub>4</sub>                                                                      | Negative | 577  | 407 |
| 101 | Epicatechin / catechin dimer <i>O</i> -hexoside                                                 | Negative | 739  | 451 |
| 102 | Epicatechin / catechin dimer <i>O</i> -hexoside                                                 | Negative | 739  | 451 |
| 103 | Epicatechin / catechin dimer <i>O</i> -hexoside                                                 | Negative | 739  | 451 |
| 104 | Epicatechin / catechin dimer <i>O</i> -hexoside                                                 | Negative | 739  | 451 |
| 105 | Procyanidin B <sub>2</sub>                                                                      | Negative | 577  | 407 |
| 106 | Procyanidin B <sub>2</sub> 3- <i>O</i> -gallate                                                 | Negative | 729  | 441 |
| 107 | Procyanidin B <sub>2</sub> 3''- <i>O</i> -gallate                                               | Negative | 729  | 441 |
| 108 | Epicatechin / catechin dimer <i>O</i> -gallate                                                  | Negative | 729  | 441 |
| 109 | Procyanidin B <sub>2</sub> 3,3''-di- <i>O</i> -gallate                                          | Negative | 881  | 559 |
| 110 | 1- <i>O</i> -Ellagoyl-gentiobiose (amritoside)                                                  | Negative | 625  | 301 |
| 111 | Epicatechin gallate                                                                             | Negative | 441  | 289 |
| 112 | Ellagic acid di- <i>O</i> -desoxyhexoside                                                       | Negative | 593  | 301 |
| 113 | Ellagic acid 4- <i>O</i> -rhamnoside (eschweilenol C)                                           | Negative | 447  | 301 |
| 114 | Epicatechin / catechin tetramer                                                                 | Negative | 1153 | 577 |
| 115 | Epicatechin / catechin tetramer                                                                 | Negative | 1153 | 577 |
| 116 | Epicatechin / catechin tetramer                                                                 | Negative | 1153 | 577 |
| 117 | Epicatechin / catechin tetramer                                                                 | Negative | 1153 | 577 |
| 118 | Epicatechin / catechin pentamer                                                                 | Negative | 1441 | 863 |
| 119 | Epicatechin / catechin pentamer                                                                 | Negative | 1441 | 863 |
| 120 | Epicatechin / catechin pentamer                                                                 | Negative | 1441 | 863 |
| 121 | Epicatechin / catechin pentamer                                                                 | Negative | 1441 | 863 |
| 122 | Epicatechin / catechin pentamer                                                                 | Negative | 1441 | 863 |
| 123 | Epicatechin / catechin pentamer                                                                 | Negative | 1441 | 863 |

**Table S3.** Regression equations, correlation coefficients ( $r^2$ ), standard deviation ( $S_{yx}$ ), limits of detection (LOD), limits of quantification (LOQ) and linear ranges for 34 reference standards.

| Compound                                                  | Ionization <sup>a</sup> | CE <sup>b</sup><br>(eV) | Regression Equation <sup>c</sup> |                | $r^2$  | $S_{yx}$              | LOD/<br>LOQ<br>( $\mu\text{g/mL}$ ) | Linear<br>Range<br>( $\mu\text{g/mL}$ ) |
|-----------------------------------------------------------|-------------------------|-------------------------|----------------------------------|----------------|--------|-----------------------|-------------------------------------|-----------------------------------------|
|                                                           |                         |                         | $a$                              | $b \cdot 10^6$ |        |                       |                                     |                                         |
| 1-O-Caffeoylquinic acid                                   | N                       | -15                     | 2.5394                           | -1.2360        | 0.9994 | $0.45 \cdot 10^{-2}$  | 0.006/0.02                          | 0.02–300.0                              |
| 1-O-Galloyl- $\beta$ -D-glucopyranose                     | N                       | -20                     | 1.3586                           | -0.0663        | 0.9987 | $9.69 \cdot 10^{-2}$  | 0.24/0.71                           | 0.8–100.0                               |
| 1,6-Di-O-galloyl glucose                                  | N                       | -20                     | 1.7552                           | -0.0569        | 0.9982 | $8.89 \cdot 10^{-2}$  | 0.18/0.51                           | 0.6–100.0                               |
| 1,3,6-Tri-O-galloyl glucose                               | N                       | -25                     | 2.1064                           | -0.0499        | 0.9985 | $8.74 \cdot 10^{-2}$  | 0.14/0.42                           | 0.5–100.0                               |
| 1,2,3,6-Tetra-O-galloyl glucose                           | N                       | -25                     | 2.0168                           | -0.0629        | 0.9973 | $9.00 \cdot 10^{-2}$  | 0.15/0.45                           | 0.5–100.0                               |
| 1,2,3,4,6-Penta-O-galloyl glucose                         | N                       | -25                     | 2.4561                           | -0.0171        | 0.9979 | $12.33 \cdot 10^{-2}$ | 0.17/0.50                           | 0.6–100.0                               |
| 2-Pyrone-4,6-dicarboxylic acid                            | N                       | -20                     | 1.8535                           | 0.0742         | 0.9970 | $4.55 \cdot 10^{-2}$  | 0.08/0.25                           | 0.3–100.0                               |
| 5-O-Caffeoylquinic acid                                   | N                       | -15                     | 2.9021                           | -1.4184        | 0.9998 | $0.39 \cdot 10^{-2}$  | 0.004/0.01                          | 0.02–300.0                              |
| Catechin                                                  | N                       | -20                     | 0.9562                           | -0.0521        | 0.9971 | $7.79 \cdot 10^{-2}$  | 0.27/0.82                           | 0.90–100.0                              |
| Corilagin                                                 | N                       | -35                     | 0.9634                           | -0.3518        | 0.9804 | $7.34 \cdot 10^{-2}$  | 0.25/0.76                           | 0.8–100.0                               |
| Gallic acid                                               | N                       | -10                     | 2.6538                           | -0.1376        | 0.9990 | $1.17 \cdot 10^{-2}$  | 0.01/0.04                           | 0.10–100.0                              |
| Epicatechin                                               | N                       | -20                     | 1.0828                           | -0.0456        | 0.9973 | $6.85 \cdot 10^{-2}$  | 0.21/0.63                           | 0.70–100.0                              |
| Epicatechin gallate                                       | N                       | -20                     | 1.5152                           | -0.0523        | 0.9979 | $12.67 \cdot 10^{-2}$ | 0.28/0.84                           | 0.90–100.0                              |
| Epigallocatechin                                          | N                       | -35                     | 1.2824                           | -0.1440        | 0.9987 | $14.44 \cdot 10^{-2}$ | 0.37/1.12                           | 1.2–100.0                               |
| Ellagic acid                                              | N                       | -30                     | 0.9114                           | -0.6312        | 0.9887 | $6.37 \cdot 10^{-2}$  | 0.23/0.70                           | 0.7–100.0                               |
| Eschweilenol C                                            | N                       | -30                     | 1.2820                           | -0.9634        | 0.9697 | $11.64 \cdot 10^{-2}$ | 0.30/0.91                           | 1.0–100.0                               |
| Helichrysin                                               | N                       | -30                     | 2.0319                           | -0.3615        | 0.9811 | $10.09 \cdot 10^{-2}$ | 0.17/0.52                           | 0.6–100.0                               |
| Juglanin                                                  | N                       | -20                     | 2.0384                           | -0.3640        | 0.9975 | $2.02 \cdot 10^{-2}$  | 0.03/0.10                           | 0.10–350.0                              |
| Kaempferol-3-O- $\beta$ -D-glucuronopyranoside            | N                       | -30                     | 2.2126                           | -0.5160        | 0.9987 | $8.11 \cdot 10^{-2}$  | 0.12/0.37                           | 0.4–100.0                               |
| Kaempferol-3-O-(6''-galloyl)- $\beta$ -D-glucopyranoside  | N                       | -10                     | 1.2416                           | -0.3615        | 0.9901 | $3.02 \cdot 10^{-2}$  | 0.08/0.24                           | 0.3–100.0                               |
| Miquelianin                                               | N                       | -20                     | 1.6705                           | -0.4374        | 0.9988 | $12.79 \cdot 10^{-2}$ | 0.25/0.77                           | 0.8–100.0                               |
| Peonidin                                                  | P                       | +20                     | 0.9634                           | -0.8634        | 0.9832 | $10.37 \cdot 10^{-2}$ | 0.36/1.07                           | 1.1–100.0                               |
| 3,5-di-O- $\beta$ -D-glucopyranoside                      | N                       | -30                     | 1.3722                           | -0.0829        | 0.9973 | $9.93 \cdot 10^{-2}$  | 0.24/0.72                           | 0.80–100.0                              |
| Procyanidin B <sub>1</sub>                                | N                       | -30                     | 1.3620                           | -0.0820        | 0.9961 | $9.91 \cdot 10^{-2}$  | 0.21/0.72                           | 0.80–100.0                              |
| Procyanidin B <sub>2</sub>                                | N                       | -35                     | 0.9361                           | -0.4518        | 0.9870 | $9.35 \cdot 10^{-2}$  | 0.32/1.00                           | 1.0–100.0                               |
| Procyanidin B <sub>2</sub> 3''-O-gallate                  | N                       | -35                     | 1.5963                           | -0.3518        | 0.9910 | $14.63 \cdot 10^{-2}$ | 0.30/0.92                           | 1.0–100.0                               |
| Procyanidin B <sub>2</sub> 3,3''-di-O-gallate             | N                       | -25                     | 1.4632                           | -0.0524        | 0.9953 | $8.12 \cdot 10^{-2}$  | 0.18/0.56                           | 0.6–100.0                               |
| Procyanidin B <sub>3</sub>                                | N                       | -20                     | 1.6341                           | -0.4283        | 0.9900 | $15.02 \cdot 10^{-2}$ | 0.30/0.92                           | 1.0–100.0                               |
| Procyanidin B <sub>4</sub>                                | N                       | -25                     | 1.0634                           | -0.0933        | 0.9902 | $10.01 \cdot 10^{-2}$ | 0.31/0.94                           | 1.0–100.0                               |
| Quercitrin                                                | N                       | -20                     | 1.9871                           | -0.6871        | 0.9984 | $5.63 \cdot 10^{-2}$  | 0.09/0.28                           | 0.40–400.0                              |
| Quercetin-3-O-(6''-galloyl)- $\beta$ -D-galactopyranoside | N                       | -25                     | 1.1492                           | -0.6010        | 0.9980 | $4.68 \cdot 10^{-2}$  | 0.14/0.41                           | 0.50–400.0                              |
| Rutin                                                     | N                       | -20                     | 1.2716                           | -0.7389        | 0.9897 | $9.14 \cdot 10^{-2}$  | 0.23/0.72                           | 0.80–400.0                              |
| Tiliroside                                                | N                       | -30                     | 2.3312                           | -0.4563        | 0.9803 | $14.92 \cdot 10^{-2}$ | 0.21/0.64                           | 0.7–100.0                               |
| Taxifolin                                                 | N                       | -15                     | 1.1105                           | -0.3211        | 0.9937 | $4.18 \cdot 10^{-2}$  | 0.12/0.38                           | 0.4–100.0                               |

<sup>a</sup> Ionization mode : N—negative ; P—positive. <sup>b</sup> CE—collision energy. <sup>c</sup> Regression equation:  $y = a \cdot x + b$ .

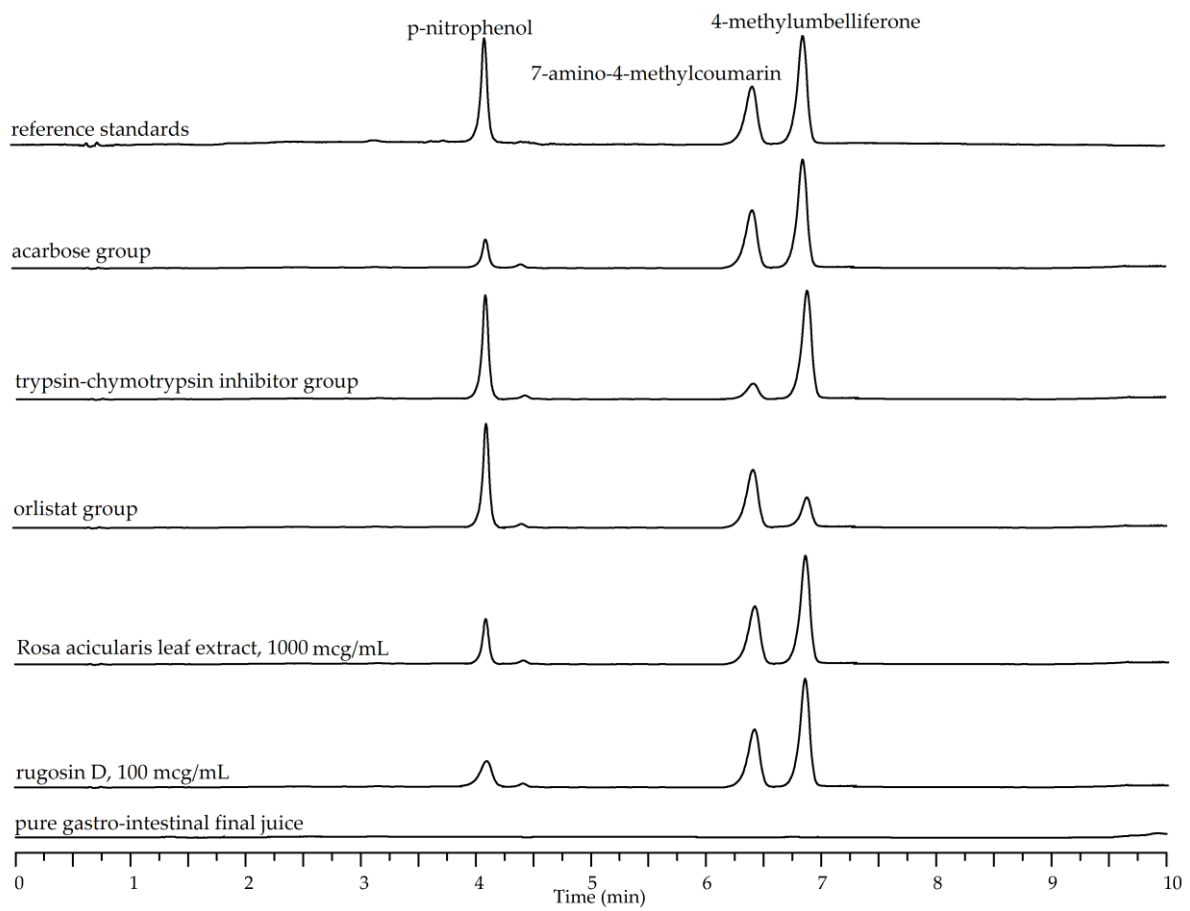

**Figure S1.** HPLC-DAD chromatograms of gastro-intestinal digestion markers (*p*-nitrophenol, 7-amino-4-methylcoumarin, 4-methylumbelliferone) after digestion of artificial substrate mixture. Experimental groups: reference standards (*p*-nitrophenol, 20 µg/mL; 7-amino-4-methylcoumarin, 10 µg/mL; 4-methylumbelliferone, 15 µg/mL); acarbose group; trypsin-chymotrypsin inhibitor group; orlistat group; *R. acicularis* leaf extract, 1000 µg/mL, group; rugosin D, 100 µg/mL, group; pure gastro-intestinal final juice without addition of plant extracts and inhibitors.
